# Supplementary material for: Primary fatty amides in plasma associated with brain amyloid burden, hippocampal volume, and memory in the European Medical Information Framework for Alzheimer’s Disease biomarker discovery cohort
Source: PubMed Central journal article supplement — Alzheimers Dement. Author manuscript; Available in PMC 2019 Nov 12. (PMC6849698; doi:10.1016/j.jalz.2019.03.004), 2019-05-08
Supplement: NIHMS1053807-supplement-Supplementary_Tables.pdf [file NIHMS1053807-supplement-Supplementary_Tables.pdf]

| Metabolites          | APOE ε4 |                        | NC vs AD |                               | cMCI vs sMCI |                        | NC vs cMCI&AD |                               | MMSE   |                               | ROD    |                               |
|----------------------|---------|------------------------|----------|-------------------------------|--------------|------------------------|---------------|-------------------------------|--------|-------------------------------|--------|-------------------------------|
|                      | OR      | p                      | OR       | p                             | OR           | p                      | OR            | p                             | Beta   | p                             | Beta   | p                             |
| 12,13-DiHOME         | 1.035   | 6.76×10 <sup>-01</sup> | 1.385    | 9.90×10 <sup>-03</sup>        | 0.659        | 2.83×10 <sup>-02</sup> | 1.231         | 6.26×10 <sup>-02</sup>        | 0.015  | 9.24×10 <sup>-01</sup>        | -0.061 | 2.46×10 <sup>-01</sup>        |
| 9,10-DiHOME          | 1.037   | 6.62×10 <sup>-01</sup> | 1.316    | 3.16×10 <sup>-02</sup>        | 0.856        | 3.18×10 <sup>-01</sup> | 1.198         | 1.13×10 <sup>-01</sup>        | 0.125  | 4.33×10 <sup>-01</sup>        | -0.052 | 3.42×10 <sup>-01</sup>        |
| Argininate           | 0.759   | 1.55×10 <sup>-03</sup> | 0.496    | <b>*2.06×10<sup>-06</sup></b> | 1.005        | 9.80×10 <sup>-01</sup> | 0.490         | <b>*7.09×10<sup>-08</sup></b> | 0.836  | <b>*2.06×10<sup>-07</sup></b> | -0.217 | 3.03×10 <sup>-04</sup>        |
| Aspartate            | 0.840   | 4.77×10 <sup>-02</sup> | 0.495    | <b>*2.84×10<sup>-06</sup></b> | 0.988        | 9.51×10 <sup>-01</sup> | 0.452         | <b>*3.64×10<sup>-09</sup></b> | 1.039  | <b>*3.08×10<sup>-10</sup></b> | -0.221 | 8.19×10 <sup>-05</sup>        |
| Glutamate            | 0.889   | 1.74×10 <sup>-01</sup> | 0.527    | <b>*8.62×10<sup>-06</sup></b> | 1.008        | 9.68×10 <sup>-01</sup> | 0.499         | <b>*4.77×10<sup>-08</sup></b> | 0.865  | <b>*9.72×10<sup>-08</sup></b> | -0.240 | <b>*4.27×10<sup>-05</sup></b> |
| Linoleamide (18:2n6) | 1.032   | 7.22×10 <sup>-01</sup> | 1.842    | 5.44×10 <sup>-04</sup>        | 1.204        | 2.53×10 <sup>-01</sup> | 2.345         | <b>*2.23×10<sup>-07</sup></b> | -0.980 | <b>*5.92×10<sup>-09</sup></b> | 0.174  | 2.43×10 <sup>-03</sup>        |
| Oleamide             | 1.043   | 6.29×10 <sup>-01</sup> | 1.711    | 1.27×10 <sup>-03</sup>        | 1.367        | 6.54×10 <sup>-02</sup> | 2.340         | <b>*3.47×10<sup>-08</sup></b> | -1.000 | <b>*2.06×10<sup>-09</sup></b> | 0.198  | 6.02×10 <sup>-04</sup>        |
| Palmitamide          | 1.102   | 2.66×10 <sup>-01</sup> | 1.526    | 9.61×10 <sup>-03</sup>        | 1.405        | 3.34×10 <sup>-02</sup> | 2.196         | <b>*1.07×10<sup>-07</sup></b> | -0.938 | <b>*1.57×10<sup>-08</sup></b> | 0.183  | 1.07×10 <sup>-03</sup>        |
| Stearamide           | 1.116   | 2.03×10 <sup>-01</sup> | 1.160    | 2.90×10 <sup>-01</sup>        | 0.659        | 2.83×10 <sup>-02</sup> | 1.564         | 4.60×10 <sup>-04</sup>        | -0.621 | 1.53×10 <sup>-04</sup>        | 0.139  | 2.11×10 <sup>-02</sup>        |

**Supp. Table 1. Association between metabolites (from Table 2 and S1) with APOE ε4, diagnosis and MMSE.** Positive Beta value denotes higher metabolite levels associate higher MMSE and ROD.

\* Passed Bonferroni Procedure ( $p < 7.72 \times 10^{-5}$ )

Abbreviations: APOE ε4, ApolipoproteinE ε4; NC, Normal Cognition; cMCI, Converting Mild Cognitive Impairment; AD, Alzheimer's Disease, MMSE, Mini Mental State Examination; ROD, Rate of cognitive decline.

| Metabolites          | Attention |                               | Executive |                        | Language |                               | Memory Delayed Delayed |                        | Memory Immediate Immediate |                               | Visuoconstruction |                        |
|----------------------|-----------|-------------------------------|-----------|------------------------|----------|-------------------------------|------------------------|------------------------|----------------------------|-------------------------------|-------------------|------------------------|
|                      | Beta      | p                             | Beta      | p                      | Beta     | p                             | Beta                   | p                      | Beta                       | p                             | Beta              | p                      |
| 12,13-DiHOME         | 0.132     | 6.27×10 <sup>-02</sup>        | -0.038    | 6.65×10 <sup>-01</sup> | -0.055   | 3.48×10 <sup>-01</sup>        | -0.078                 | 2.61×10 <sup>-01</sup> | 0.093                      | 2.20×10 <sup>-01</sup>        | 0.195             | 2.95×10 <sup>-02</sup> |
| 9,10-DiHOME          | -0.013    | 8.52×10 <sup>-01</sup>        | -0.023    | 7.77×10 <sup>-01</sup> | -0.069   | 2.34×10 <sup>-01</sup>        | -0.105                 | 1.30×10 <sup>-01</sup> | 0.095                      | 1.94×10 <sup>-01</sup>        | 0.086             | 2.94×10 <sup>-01</sup> |
| Argininate           | 0.003     | 9.66×10 <sup>-01</sup>        | 0.086     | 3.38×10 <sup>-01</sup> | 0.277    | <b>*2.21×10<sup>-06</sup></b> | 0.184                  | 1.07×10 <sup>-02</sup> | 0.163                      | 3.13×10 <sup>-02</sup>        | -0.004            | 9.65×10 <sup>-01</sup> |
| Aspartate            | 0.147     | 4.84×10 <sup>-02</sup>        | 0.336     | 2.28×10 <sup>-04</sup> | 0.250    | <b>*3.36×10<sup>-05</sup></b> | 0.096                  | 1.76×10 <sup>-01</sup> | -0.036                     | 6.44×10 <sup>-01</sup>        | -0.060            | 4.84×10 <sup>-01</sup> |
| Glutamate            | 0.149     | 3.93×10 <sup>-02</sup>        | 0.210     | 1.59×10 <sup>-02</sup> | 0.244    | <b>*2.75×10<sup>-05</sup></b> | 0.133                  | 6.37×10 <sup>-02</sup> | 0.034                      | 6.52×10 <sup>-01</sup>        | -0.016            | 8.47×10 <sup>-01</sup> |
| Linoleamide (18:2n6) | -0.396    | <b>*2.89×10<sup>-07</sup></b> | -0.027    | 8.26×10 <sup>-01</sup> | -0.239   | 9.88×10 <sup>-05</sup>        | -0.057                 | 6.47×10 <sup>-01</sup> | -0.491                     | <b>*1.03×10<sup>-09</sup></b> | 0.080             | 3.83×10 <sup>-01</sup> |
| Oleamide             | -0.404    | <b>*1.02×10<sup>-07</sup></b> | -0.159    | 1.47×10 <sup>-01</sup> | -0.245   | <b>*5.87×10<sup>-05</sup></b> | -0.041                 | 6.89×10 <sup>-01</sup> | -0.431                     | <b>*5.35×10<sup>-08</sup></b> | 0.064             | 4.82×10 <sup>-01</sup> |
| Palmitamide          | -0.427    | <b>*1.41×10<sup>-08</sup></b> | -0.214    | 5.34×10 <sup>-02</sup> | -0.228   | 1.70×10 <sup>-04</sup>        | -0.012                 | 9.07×10 <sup>-01</sup> | -0.376                     | <b>*1.58×10<sup>-06</sup></b> | 0.042             | 6.62×10 <sup>-01</sup> |
| Stearamide           | -0.376    | <b>*1.84×10<sup>-07</sup></b> | -0.097    | 3.15×10 <sup>-01</sup> | -0.156   | 8.43×10 <sup>-03</sup>        | 0.039                  | 6.28×10 <sup>-01</sup> | -0.279                     | 2.62×10 <sup>-04</sup>        | 0.025             | 7.69×10 <sup>-01</sup> |

**Supp. Table 2. Association between the nine selected metabolites and cognitive function measurements.** Positive Beta value denotes higher metabolite levels associate higher cognitive function measurements.

\* Passed Bonferroni Procedure ( $p < 7.72 \times 10^{-5}$ )

| Metabolites                 | Hippo R  |                                | Hippo L  |                        | Hippo Sum |                                | Cortical Whole |                        | Cortical in AD |                        |
|-----------------------------|----------|--------------------------------|----------|------------------------|-----------|--------------------------------|----------------|------------------------|----------------|------------------------|
|                             | Beta     | p                              | Beta     | p                      | Beta      | p                              | Beta           | p                      | Beta           | p                      |
| <b>12,13-DiHOME</b>         | 17.313   | 5.20×10 <sup>-01</sup>         | 7.733    | 7.79×10 <sup>-01</sup> | 25.055    | 6.31×10 <sup>-01</sup>         | 0.005          | 3.55×10 <sup>-01</sup> | 0.002          | 8.26×10 <sup>-01</sup> |
| <b>9,10-DiHOME</b>          | 23.698   | 3.75×10 <sup>-01</sup>         | 14.255   | 6.01×10 <sup>-01</sup> | 37.971    | 4.63×10 <sup>-01</sup>         | 0.011          | 4.12×10 <sup>-02</sup> | 0.016          | 3.71×10 <sup>-02</sup> |
| <b>Argininate</b>           | 82.386   | 5.05×10 <sup>-03</sup>         | 85.369   | 4.48×10 <sup>-03</sup> | 167.758   | 3.18×10 <sup>-03</sup>         | 0.004          | 5.62×10 <sup>-01</sup> | 0.017          | 5.32×10 <sup>-02</sup> |
| <b>Aspartate</b>            | 117.334  | 2.90×10 <sup>-04</sup>         | 97.135   | 3.43×10 <sup>-03</sup> | 214.471   | 6.32×10 <sup>-04</sup>         | -0.009         | 2.10×10 <sup>-01</sup> | 0.001          | 9.27×10 <sup>-01</sup> |
| <b>Glutamate</b>            | 146.097  | * <b>8.38×10<sup>-06</sup></b> | 127.015  | 1.60×10 <sup>-04</sup> | 273.101   | * <b>1.73×10<sup>-05</sup></b> | -0.002         | 7.73×10 <sup>-01</sup> | 0.006          | 5.22×10 <sup>-01</sup> |
| <b>Linoleamide (18:2n6)</b> | -154.910 | * <b>1.93×10<sup>-06</sup></b> | -120.036 | 3.36×10 <sup>-04</sup> | -274.928  | * <b>1.34×10<sup>-05</sup></b> | -0.015         | 5.71×10 <sup>-02</sup> | -0.025         | 2.56×10 <sup>-02</sup> |
| <b>Oleamide</b>             | -145.327 | * <b>6.11×10<sup>-06</sup></b> | -123.226 | 1.87×10 <sup>-04</sup> | -268.552  | * <b>1.63×10<sup>-05</sup></b> | -0.017         | 1.83×10 <sup>-02</sup> | -0.032         | 3.09×10 <sup>-03</sup> |
| <b>Palmitamide</b>          | -132.323 | * <b>1.60×10<sup>-05</sup></b> | -114.065 | 2.88×10 <sup>-04</sup> | -246.379  | * <b>3.40×10<sup>-05</sup></b> | -0.013         | 6.11×10 <sup>-02</sup> | -0.029         | 4.52×10 <sup>-03</sup> |
| <b>Stearamide</b>           | -105.492 | 4.21×10 <sup>-04</sup>         | -81.044  | 8.27×10 <sup>-03</sup> | -186.530  | 1.30×10 <sup>-03</sup>         | -0.012         | 7.12×10 <sup>-02</sup> | -0.022         | 2.13×10 <sup>-02</sup> |

**Supp. Table 3. Association between the nine selected metabolites with Brain measurements.** Positive Beta value denotes higher metabolite levels associate higher brain volume measurements.

\* Passed Bonferroni Procedure ( $p < 7.72 \times 10^{-5}$ )
