# Supplementary figures and images for: Primary fatty amides in plasma associated with brain amyloid burden, hippocampal volume, and memory in the European Medical Information Framework for Alzheimer’s Disease biomarker discovery cohort
Source: PubMed Central journal article supplement — Alzheimers Dement. Author manuscript; Available in PMC 2019 Nov 12. (PMC6849698; doi:10.1016/j.jalz.2019.03.004), 2019-05-08

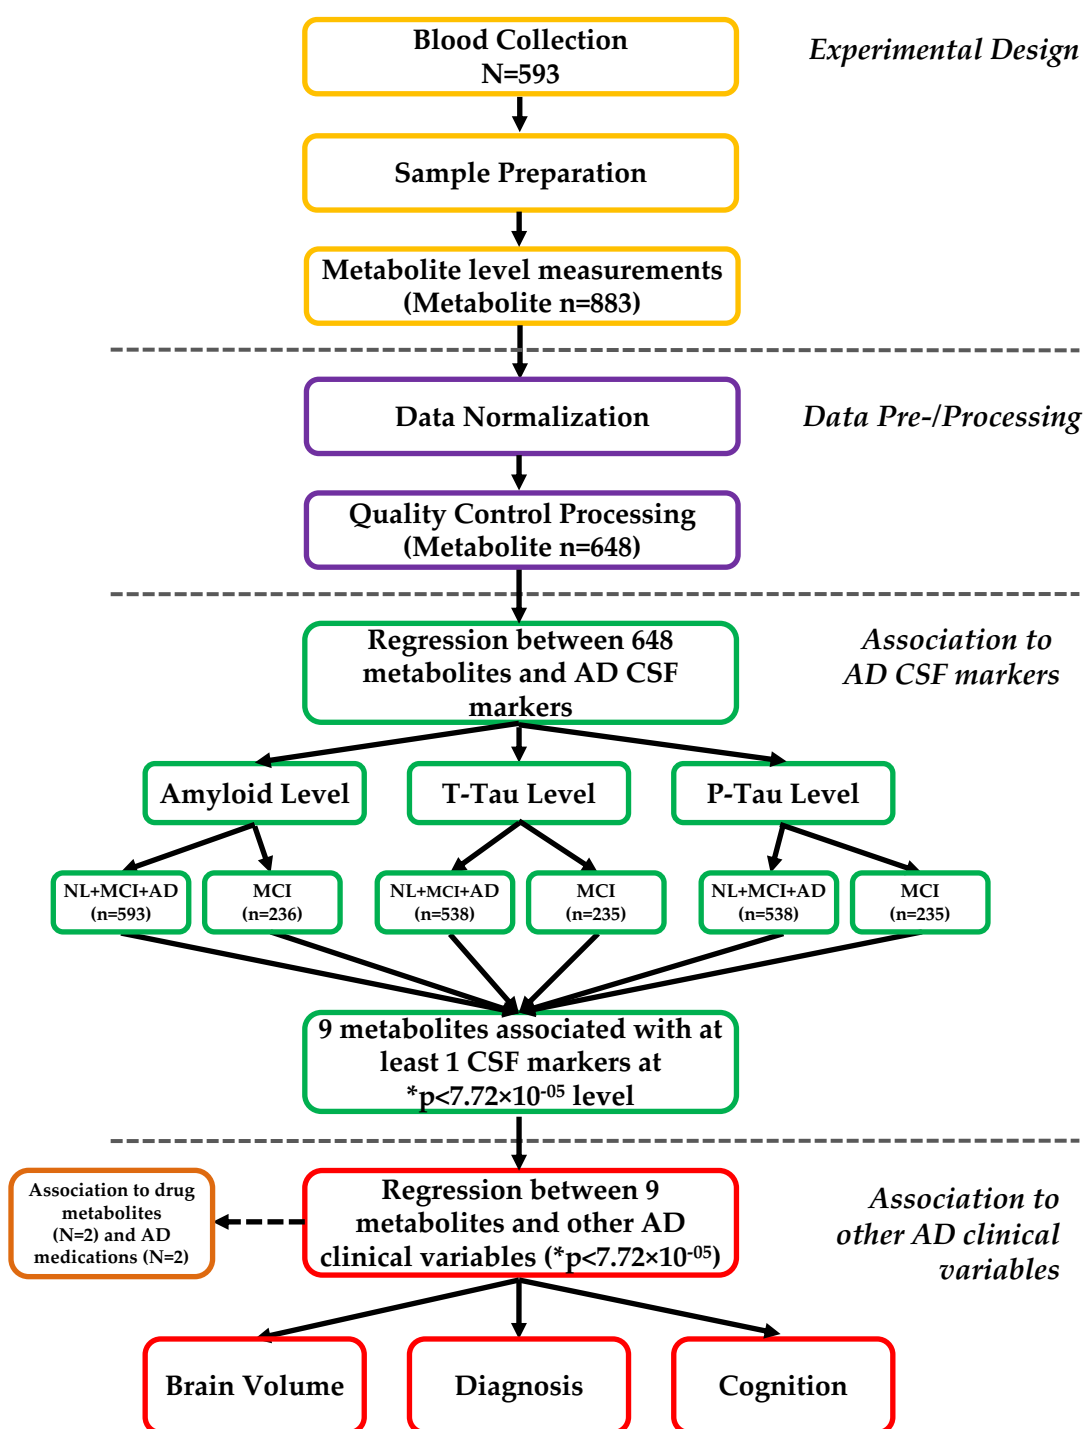

\* Bonferroni threshold  $7.72 \times 10^{-05}$  ( $=0.05/648$ ) where 648 is number of metabolites.

Supplement: NIHMS1053807-supplement-FigS1.pdf [file NIHMS1053807-supplement-FigS1.pdf]

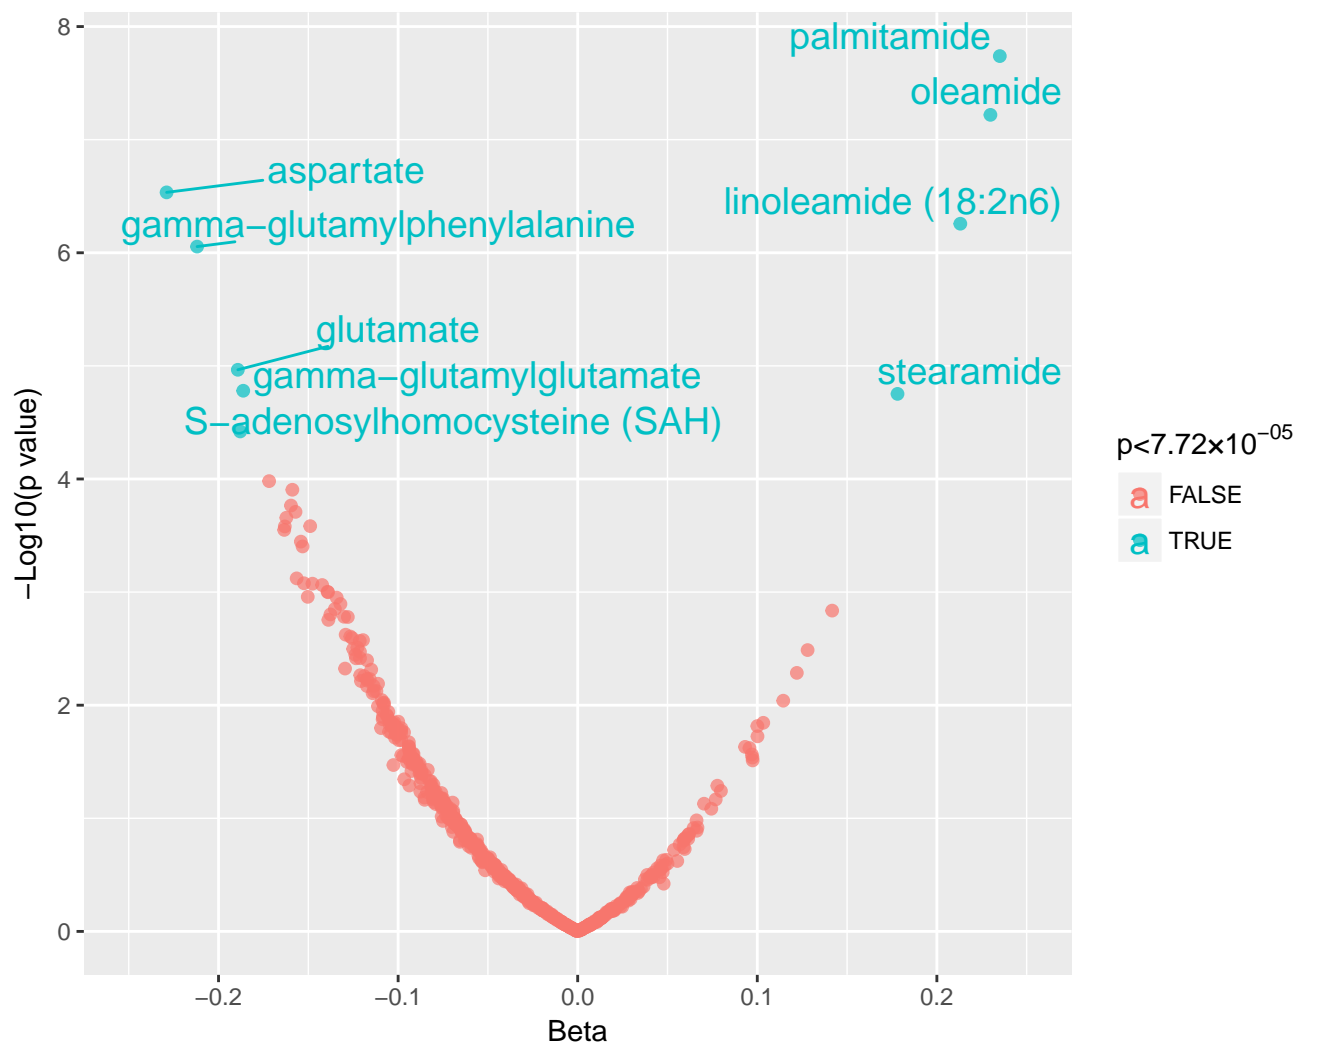

Supplement: NIHMS1053807-supplement-FigS2A.pdf [file NIHMS1053807-supplement-FigS2A.pdf]

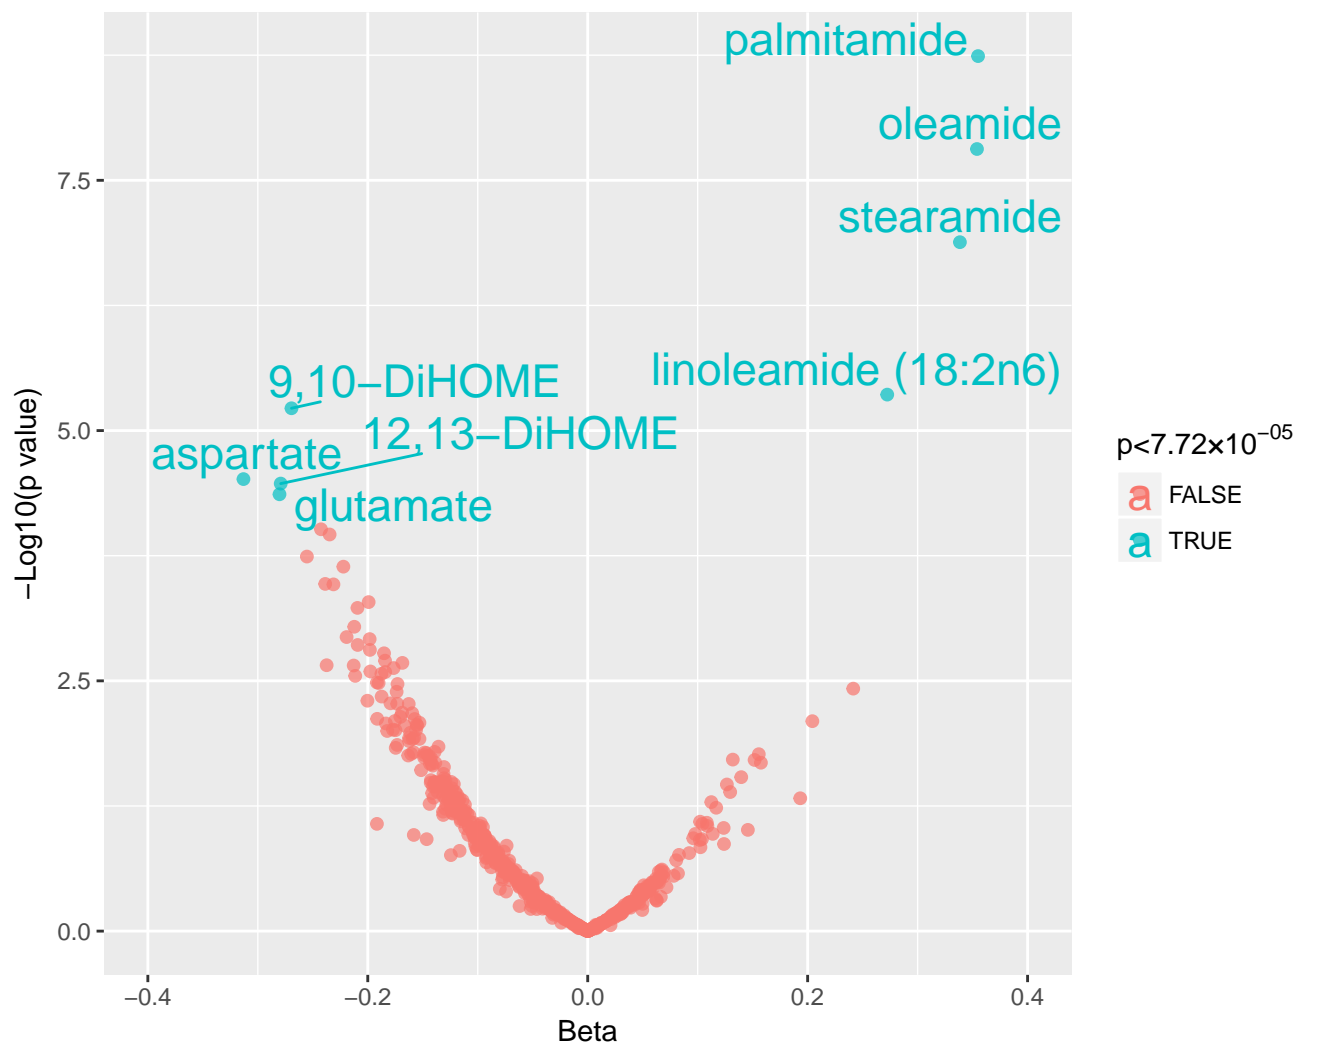

Supplement: NIHMS1053807-supplement-FigS2B.pdf [file NIHMS1053807-supplement-FigS2B.pdf]

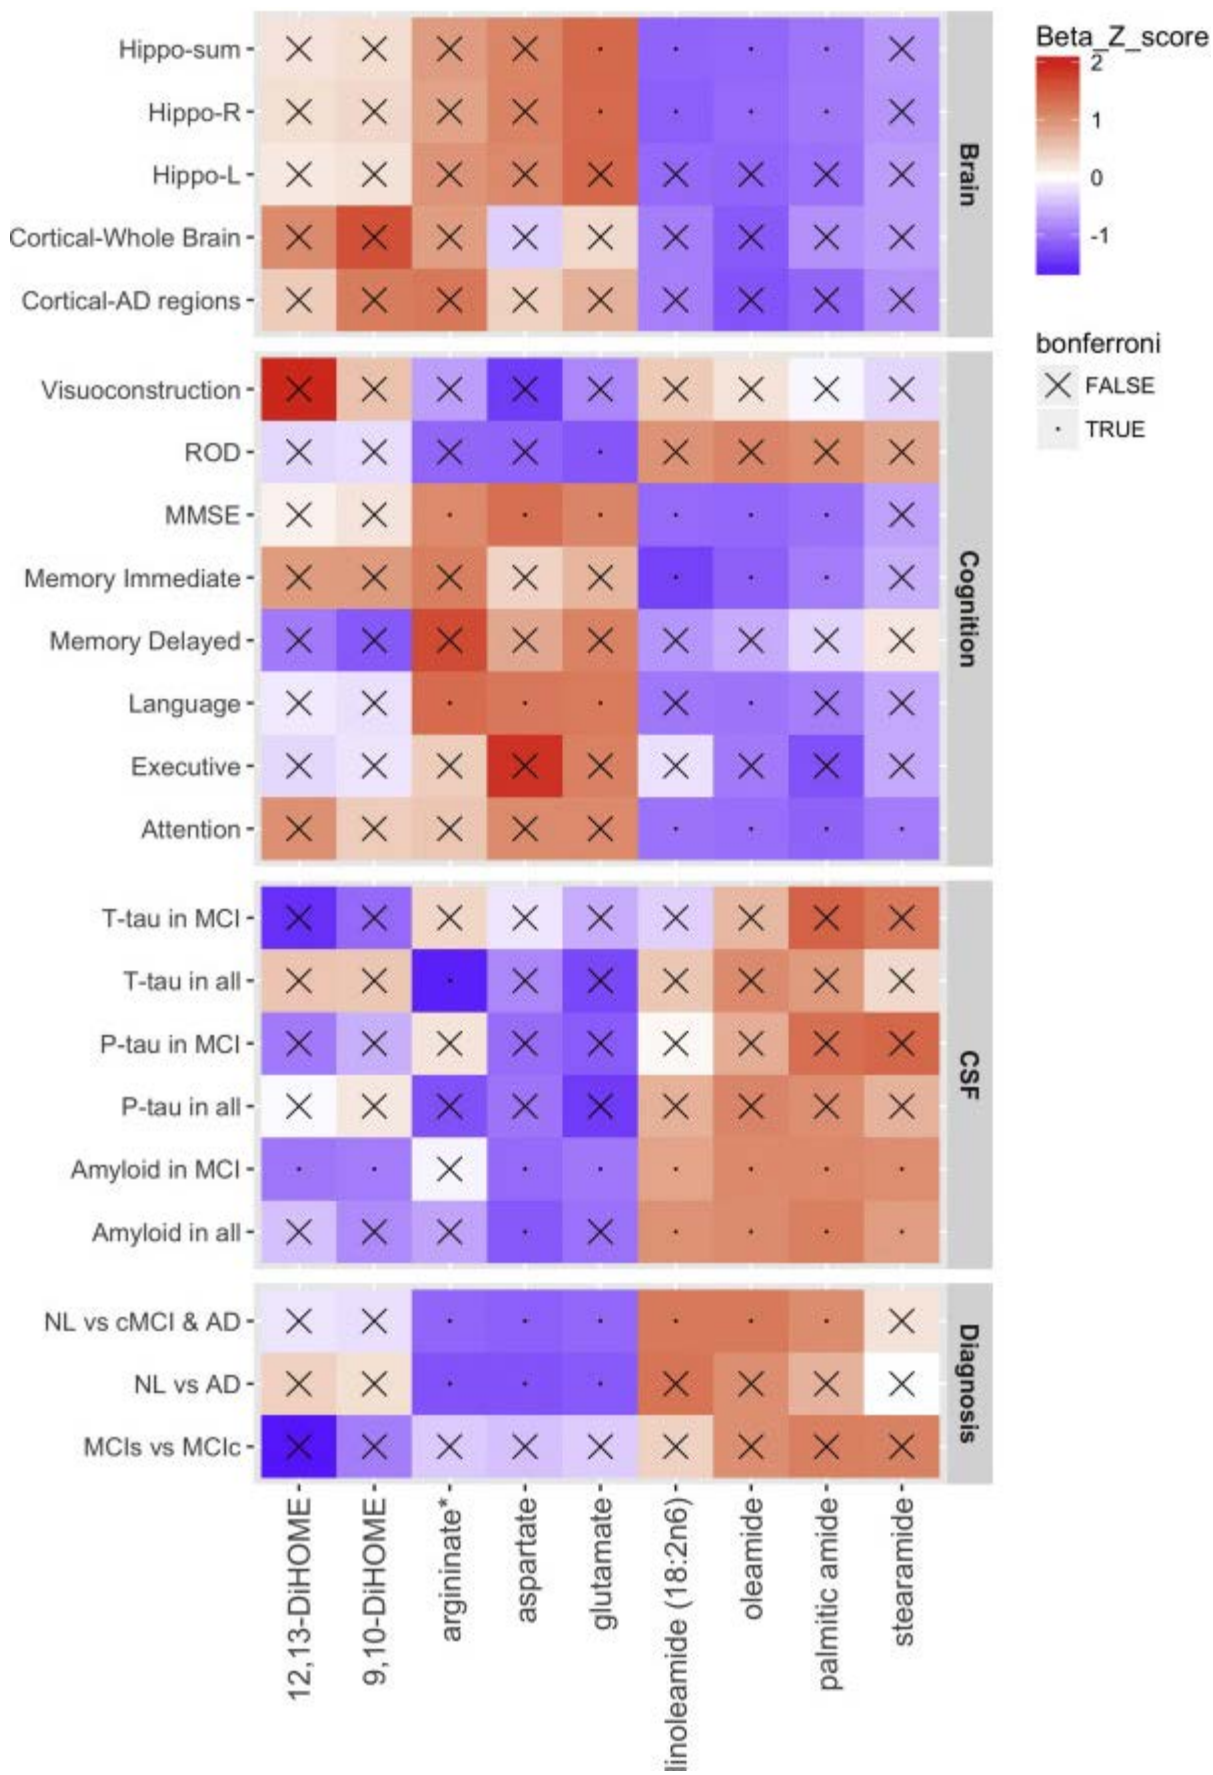

Supplement: NIHMS1053807-supplement-FigS3.pdf [file NIHMS1053807-supplement-FigS3.pdf]

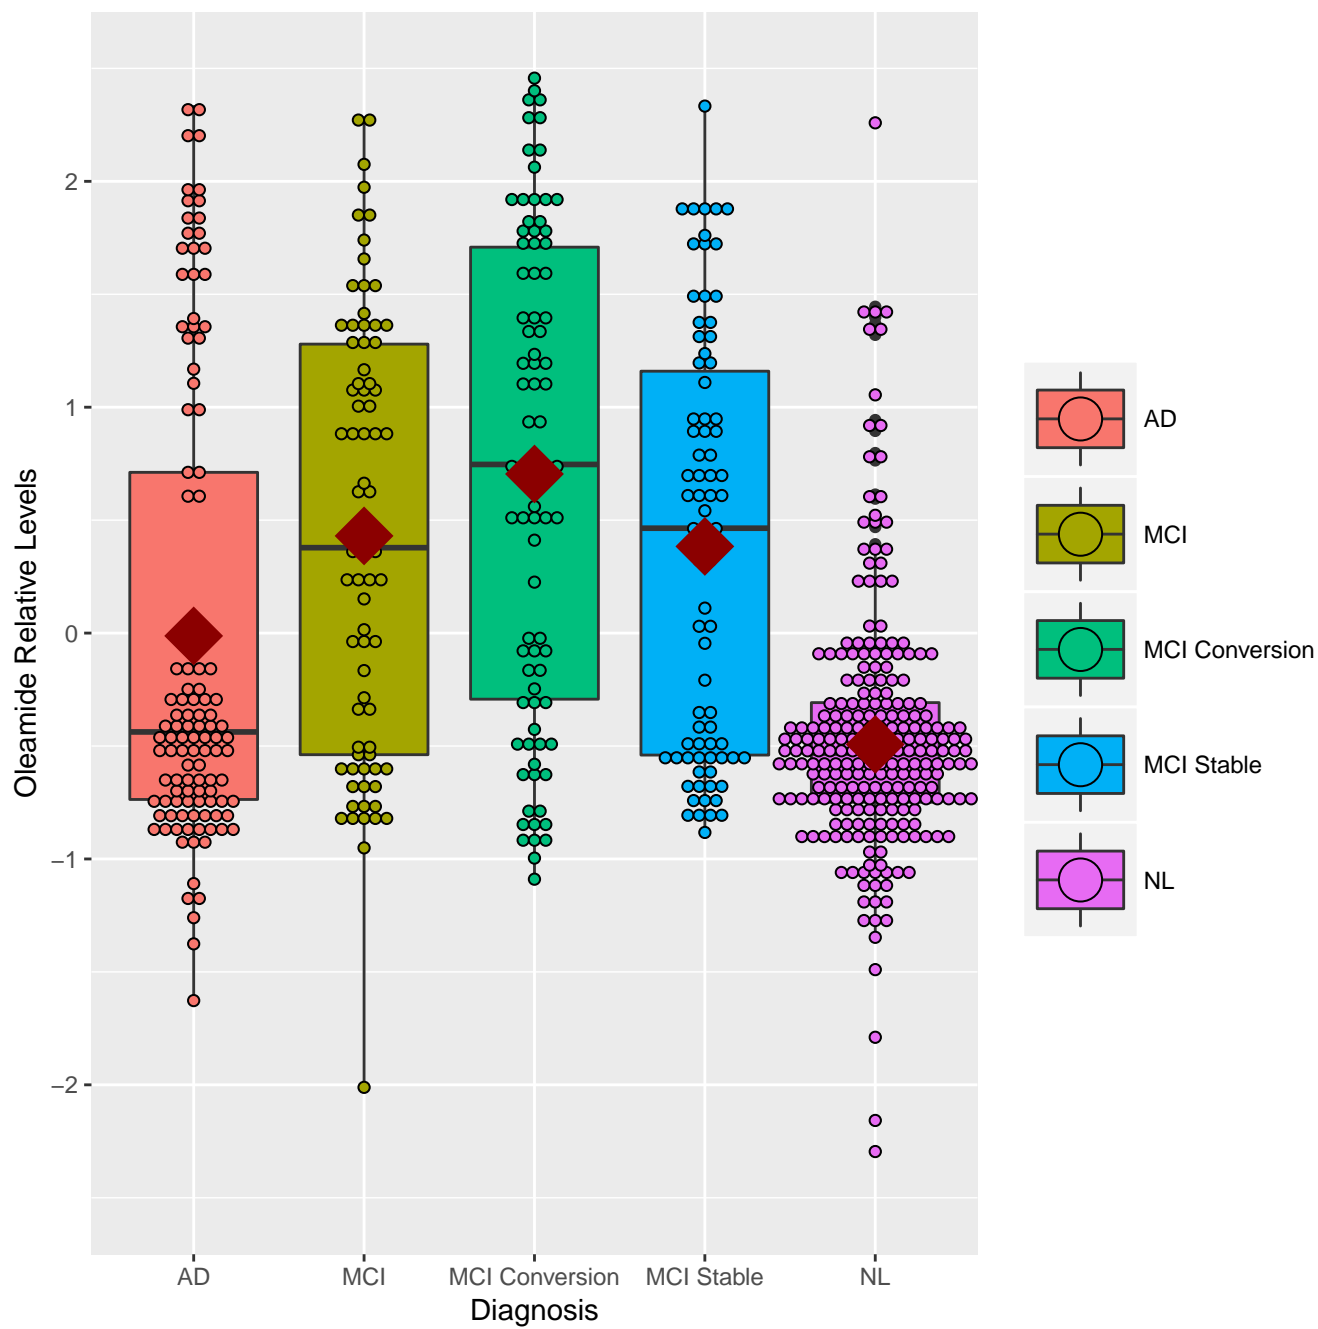

Supplement: NIHMS1053807-supplement-FigS4.pdf [file NIHMS1053807-supplement-FigS4.pdf]
